# Supplementary material for: Ftx is dispensable for imprinted X-chromosome inactivation in preimplantation mouse embryos
Source: PubMed Central journal article supplement — Sci Rep. 2014 Jun 5;4:5181. doi: 10.1038/srep05181 (PMC5381492; doi:10.1038/srep05181), 2014-06-05
Supplement: srep05181-s1.pdf [file srep05181-s1.pdf]

# Supplementary information

*Ftx is dispensable for imprinted X-chromosome inactivation in preimplantation mouse embryos*

Miki Soma<sup>1</sup>, Yoshitaka Fujihara<sup>2</sup>, Masaru Okabe<sup>2</sup>, Fumitoshi Ishino<sup>1</sup>, and Shin Kobayashi<sup>1, 3\*</sup>

1 Department of Epigenetics, Medical Research Institute, Tokyo Medical & Dental University, 1-5-45 Yushima Bunkyo-ku, Tokyo, 113-8510, Japan

2 Research Institute for Microbial Diseases, Osaka University, Yamadaoka 3-1, Suita, Osaka, 565-0871, Japan

3 Japan Science and Technology Agency, PRESTO, 4-1-8 Honcho Kawaguchi, Saitama 332-0012, Japan

Supplementary table S1. Mating of *Ftx*-deficient mice (line #77)

| Cross<br>(♀×♂) | Male pups |  | Female pups |  | Total pups | Mean litter size |
|----------------|-----------|--|-------------|--|------------|------------------|
| +/+ × -/Y      | +/Y       |  | +/-         |  | 84         | 8.4              |

  

| Cross<br>(♀×♂) | Male pups |     | Female pups |     | Total pups | Mean litter size |
|----------------|-----------|-----|-------------|-----|------------|------------------|
|                | +/Y       | -/Y | +/+         | -/+ |            |                  |
| +/- × +/Y      | 20        | 19  | 19          | 12  |            |                  |
|                | 39        |     | 31          |     | 70         | 7.8              |

  

| Cross<br>(♀×♂) | Male pups |     | Female pups |     | Total pups | Mean litter size |
|----------------|-----------|-----|-------------|-----|------------|------------------|
|                | +/Y       | -/Y | +/-         | -/- |            |                  |
| +/- × -/Y      | 33        | 36  | 26          | 25  |            |                  |
|                | 69        |     | 51          |     | 120        | 7.1              |

  

| Cross<br>(♀×♂) | Male pups | Female pups | Total pups | Mean litter size |
|----------------|-----------|-------------|------------|------------------|
|                | -/Y       | -/-         |            |                  |
| -/- × -/Y      | 12        | 17          | 29         | 5.8              |

Supplementary Table S2. A list of the PCR primer sets used in this research.

|                                              | gene name            | primer name          | sequenece (5' →3')            |                    |
|----------------------------------------------|----------------------|----------------------|-------------------------------|--------------------|
| Construction of <i>Ftx</i> disruption vector | Short arm            | Forward 169          | gcctctccaaaggctagaattc        |                    |
|                                              | Short arm            | Reverse 170          | caaccactggcatggtgata          |                    |
|                                              | Long arm             | Forward 185          | cacggcccagtgttgccaaat         |                    |
|                                              | Long arm             | Reverse 186          | tgctaatgggcaaatccaaagcca      |                    |
|                                              | Short arm            | Forward 174          | caggaggcctacactacagtaaca      |                    |
| 5' -RACE PCR                                 | <i>Ftx</i>           | GSP1 159             | gccaaagcacacatcagcttgagttgg   |                    |
|                                              | <i>Ftx</i>           | GSP2 160             | aaagttcagtcctatggccaactggctc  |                    |
| validation of recombination                  | <i>Ftx</i> short arm | Forward 173          | ggagttgggatatagctcacct        |                    |
|                                              |                      | Reverse 001          | gccttctatcgcttcttgacgagttcttc |                    |
|                                              | <i>Ftx</i> long arm  | Forward 040          | tgatgtggaatgtgtgag            |                    |
|                                              |                      | Reverse 187          | gccatgctgaatgtgtgaaggcc       |                    |
| Genotyping                                   | <i>Ftx</i>           | Forward 233          | aatagcctgccccaaagagtt         |                    |
|                                              |                      | Reverse 234          | gtcaaaggatcccgttgaa           |                    |
|                                              |                      | Forward 330          | ccgcgccacatgagcacaac          |                    |
| RT-PCR                                       | <i>Ftx</i>           | Forward 211          | gcccattcttgctctgtt            |                    |
|                                              |                      | Reverse 212          | tcgtttgtccacatctcttc          |                    |
|                                              |                      | Forward 541          | tatgccacctagcctttctaca        |                    |
|                                              |                      | Reverse 542          | atctctcaaaagcggcataat         |                    |
| qPCR                                         | beta-actin           | Forward 051          | aagtgtgacgttgacatccg          |                    |
|                                              |                      | Reverse 052          | gatccacatctgtggaagg           |                    |
|                                              | <i>Ftx</i>           | Forward 207          | atctcttgctcctctt              |                    |
|                                              |                      | Reverse 208          | tgtgtccagggtctctgt            |                    |
|                                              | <i>Xist</i>          | Forward 236          | cagagtagcaggactgaagag         |                    |
|                                              |                      | Reverse 237          | gctggtctgtctatctgtggg         |                    |
| polymorphic analysis(RFLP)                   |                      |                      |                               | Restriction enzyme |
| <i>Fmr1</i>                                  | Forward 079          | Reverse 080          | cttaacactcagggcagg            | RsaI               |
|                                              |                      | Reverse 080          | cttccctgaactctgcatcc          |                    |
| <i>Fgd1</i>                                  | Forward 084          | Reverse 085          | tcacacaaagccacctaagc          | HhaI               |
|                                              | Reverse 085          | attgactgcattgggagtg  |                               |                    |
| <i>Pdha1</i>                                 | Forward 086          | Reverse 087          | ttccagcatatgctgacttt          | TaqI               |
|                                              | Reverse 087          | tgcaaggcatgaagtgata  |                               |                    |
| <i>Rnf12</i>                                 | Forward 094          | Reverse 091          | ctggagagtctcagatgatgta        | HaeIII             |
|                                              | Reverse 091          | ggtcggcacttctgtactgc |                               |                    |
| <i>Xist</i> exon1                            | Forward 105          | Reverse 106          | ctaaaactcagcccgttcca          | SpeI               |
|                                              | Reverse 106          | gcaacccagcaatagtc    |                               |                    |
| <i>Xist</i> exon 7                           | Forward 107          | Reverse 108          | gcccaggtcacattatggt           | SacI               |
|                                              | Reverse 108          | ctccaattctgggctcaag  |                               |                    |
| <i>Slc16a2</i>                               | Forward 109          | Reverse 110          | tgtacggctcacctcattagg         | BseRI              |
|                                              | Reverse 110          | ggaagtgaagcattgttc   |                               |                    |
| <i>Ftx</i>                                   | Forward 116          | Reverse 117          | gccatctgatgcatgttg            | HpyCH4 III         |
|                                              | Reverse 117          | ggtgtggtctctgtctcc   |                               |                    |

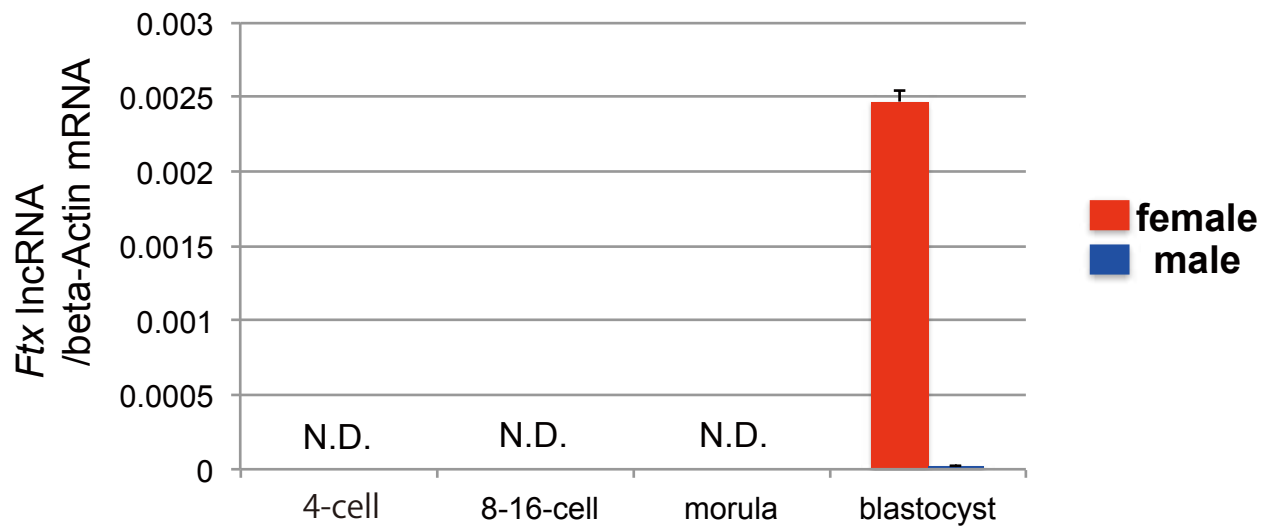

Figure S1. Expression of *Ftx* in males and females before the blastocysts stage

The expression level of *Ftx* was quantified by q-PCR in wild type embryos at preimplantation stages. 4-cell, 8-cell, and morula samples were mixture of both sexes. Only blastocyst sample was separated by sex. N.D.= not detected

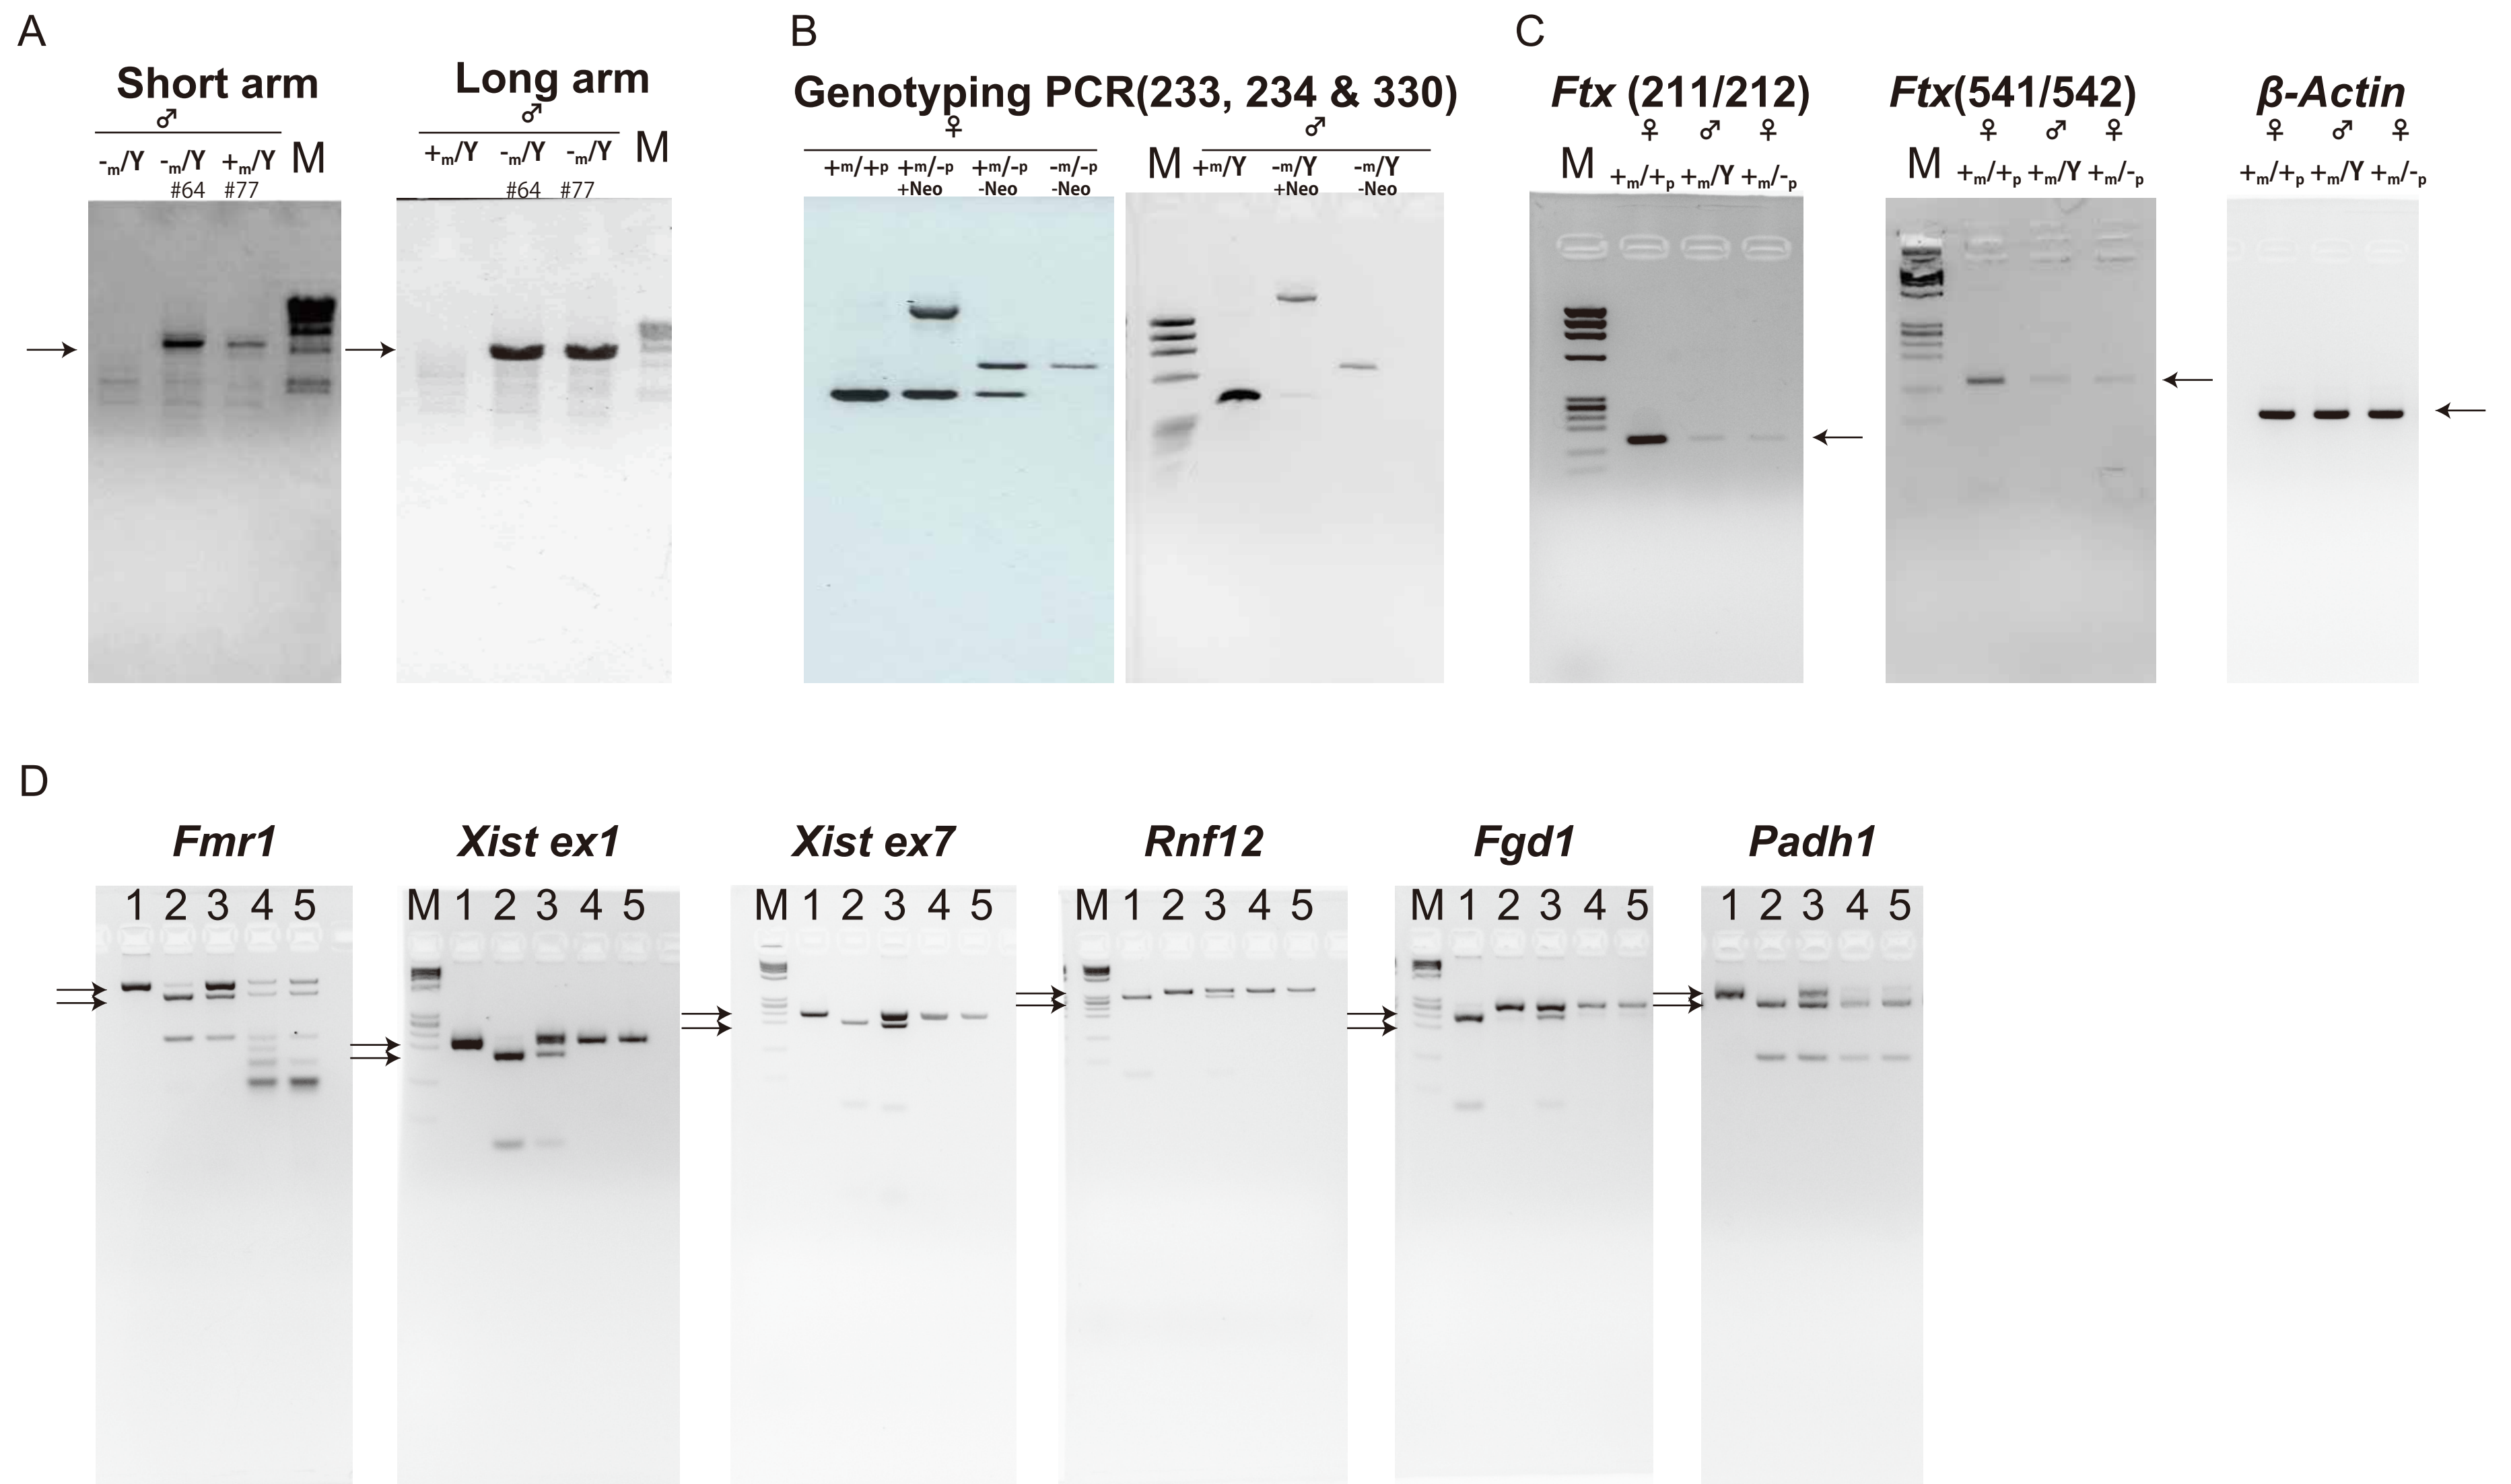

Figure S2. Full-length electrophoretic gels used to analyse the RT-PCR products and genotyping PCR.

Primers used for RT-PCR or genotyping PCR are indicated at the top of gel images. Arrows point to the PCR-amplified specific bands. M; molecular weight marker.

(A) Full-length images of cropped bands shown in Figure2b, (B) Full-length images of cropped bands shown in Figure2c, (C) Full-length images of cropped bands shown in Figure2d.

(D) Full-length images of cropped bands shown in Figure3c. 1: B6 genomic DNA, 2: JF1 genomic DNA, 3: (JF1×B6)F1 genomic DNA, 4: (JF1×B6)F1 RT-PCR products, 5: (JF1×KO)F1 PT-PCR products.
